# Supplementary material for: Integrated bioinformatics analysis to screen hub genes in the lymph node metastasis of thyroid cancer
Source: PubMed Central journal article supplement — Oncol Lett. 2019 Dec 6;19(2):1375–83. doi: 10.3892/ol.2019.11188 (PMC6956406; doi:10.3892/ol.2019.11188), 2019-12-06

Figure S1. Results of the Venn diagram and RRA. (A) Upregulated common DEGs from T1-T4 groups in the Venn diagram. (B) Downregulated common DEGs from T1-T4 groups in the Venn diagram. (C) Intersection of upregulated genes in Venn and RRA results. (D) Intersection of downregulated genes in Venn and RRA results. DEGs, differentially expressed genes; RRA, Robust Rank Aggregation.

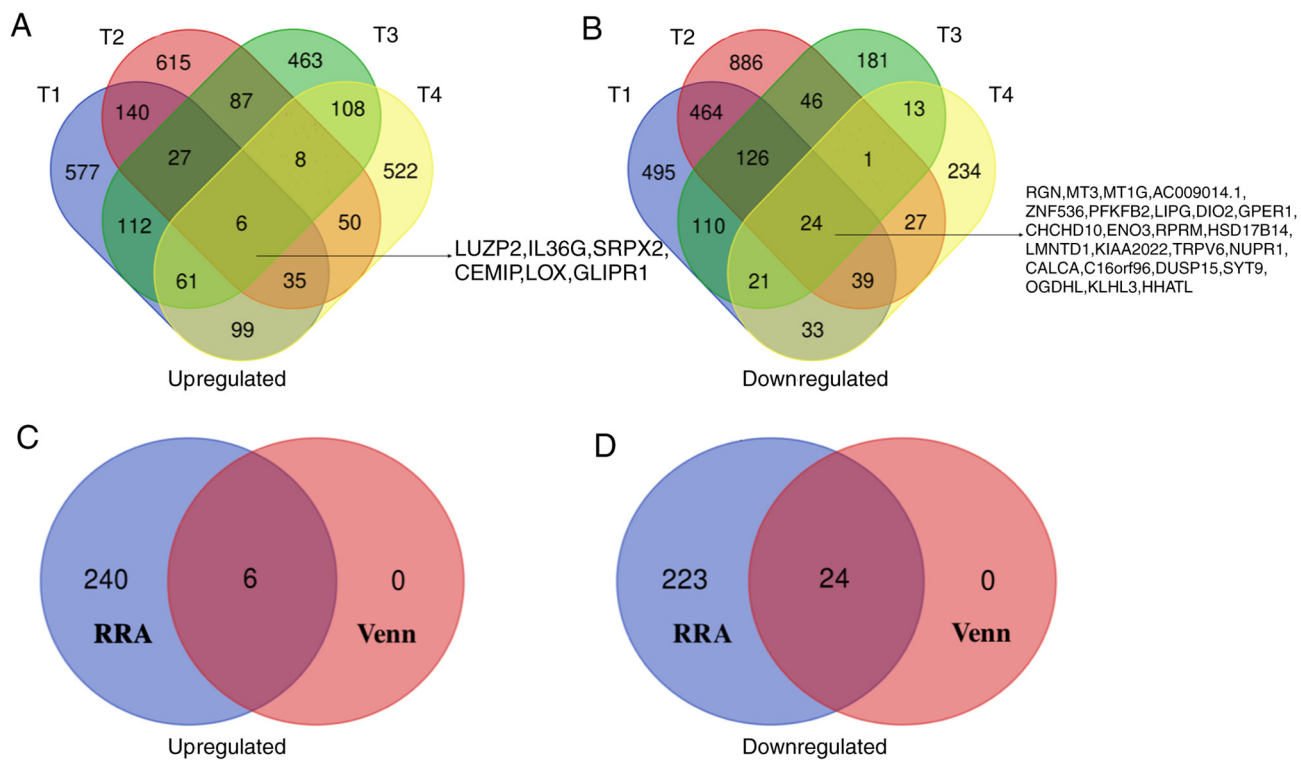

Figure S2. Kaplan-Meier curves exhibited the OS in The Cancer Genome Atlas Thyroid Cancer cohort with high and low expression of six hub genes (since the expression level of parathyroid hormone in most of samples was 0, the Kaplan-Meier curve could not be displayed). (A) Association between ACTN2 and OS. (B) Association between THBS1 and OS. (C) Association between IL6 and OS. (D) Association between COL1A1 and OS. (E) Association between ACTA1 and OS. (F) Association between CALB2 and OS. Samples were divided into under- and overexpression groups according to the mean mRNAs level. Only high expression of ACTN2 indicated a worse prognosis trend. ACTA1, actin  $\alpha$ 1; ACTN2, actinin  $\alpha$ 2; CALB2, calbindin 2; COL1A1, collagen type I  $\alpha$  1 chain; IL-6, interleukin 6; OS, overall survival; THBS1, thrombospondin 1.

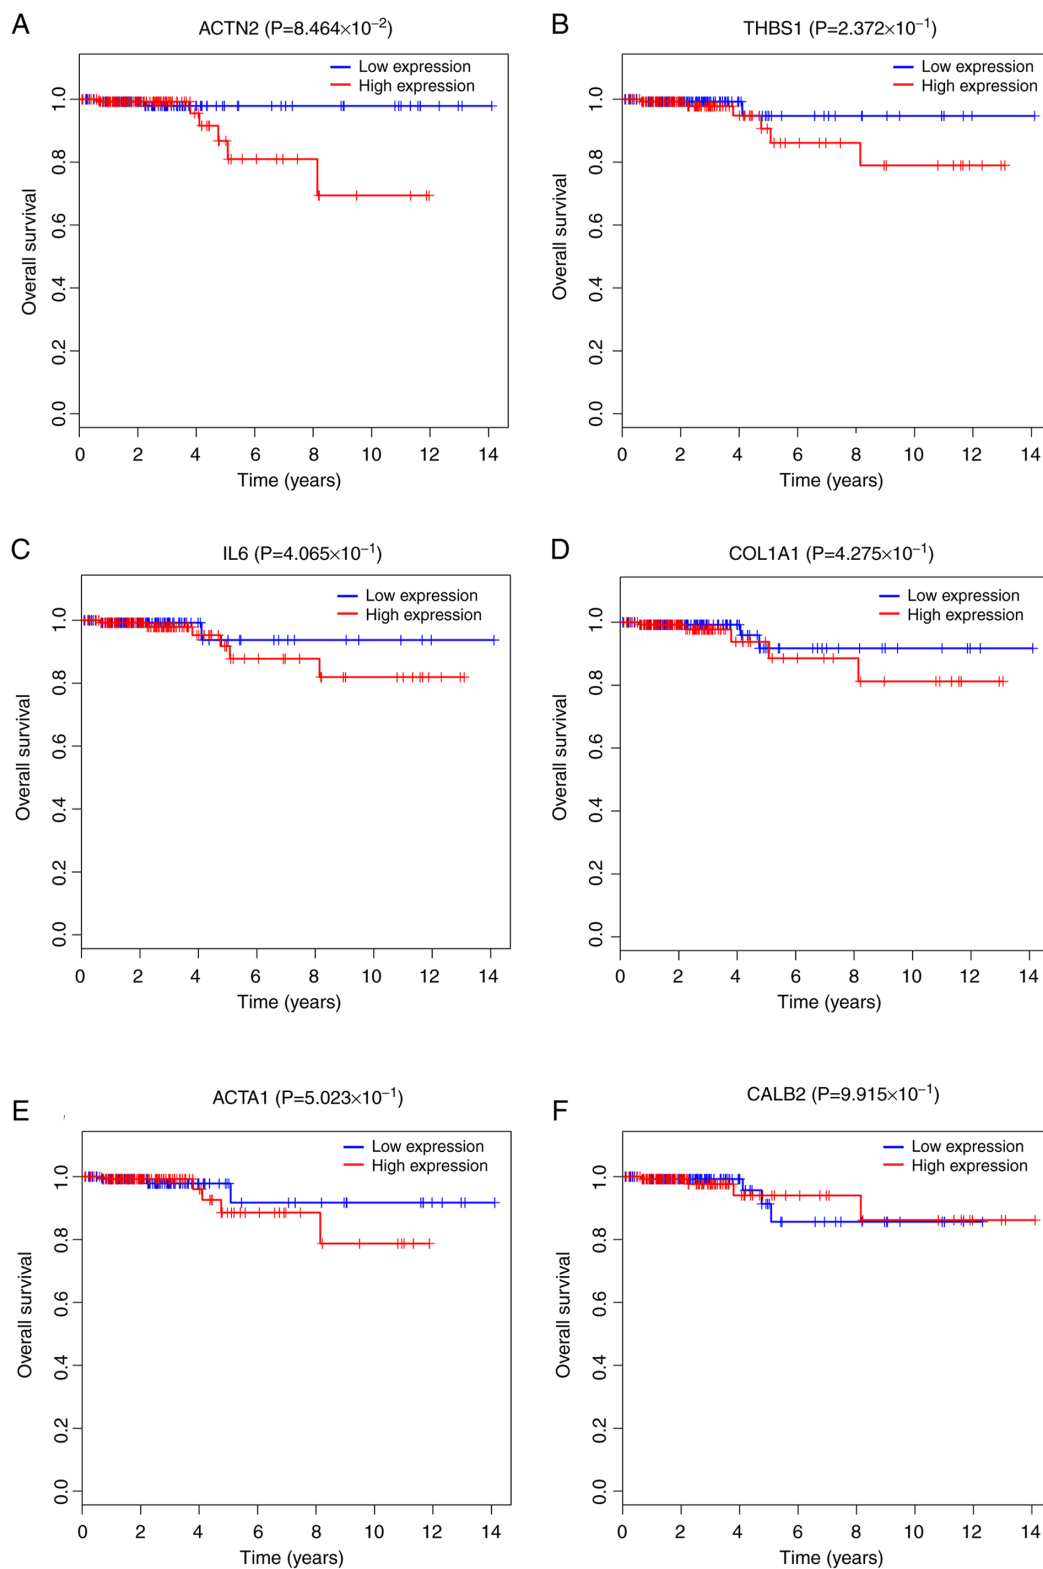

Supplement: Supplementary_Data.pdf [file Supplementary_Data.pdf]
